# Supplementary material for: Predictive Factors for Patients who Need Treatment for Chronic Post-Surgical Pain (CPSP) after Breast Cancer Surgery
Source: Research Square preprint supplement (doi:10.21203/rs.3.rs-165155/v1), 2021-02-22
Supplement: Supplementary file 1 [file 92674426834361f48fbf5f95.xlsx]

## Sheet: Table6
Univariate and multivariate logistic regression analyses of patient- and treatment-related
factors predicting the need for treatment for chronic postsurgical pain in patients
who developed pain after breast cancer surgery
Variables	n (%)	Univariate			Multivariate
		P value	OR (95% CI)		P value	OR (95% CI)
Age at surgery (by 1 year)	156	0.77	0.993 (0.95–1.04)
Months after surgery (by 1 month)	156	0.69	1.00 (0.99–1.01)
BMI at surgery	155
25<	141 (90)	0.81	1 (Reference)
<25	14 (10)		1.15 (0.38–3.91)
Distribution of postsurgical pain regions	156
1	101 (65)	0.004*	1 (Reference)		0.020*	1 (Reference)
> 2	55 (35)		2.71 (1.38–5.39)			2.52 (1.16–5.57)
Use of analgesics within the first month after surgery	132
No	68 (52)	0.026*	1 (Reference)		0.083	1 (Reference)
Yes	64 (48)		2.25 (1.11–4.67)			1.95 (0.92–4.18)
Surgery, breast	156
BCS	88 (56)	0.43	1 (Reference)
Mastectomy	68 (44)		1.30 (0.68–2.49)
Axillary lymph node dissection	156
No	119 (76)	0.083	1 (Reference)
Yes	37 (24)		1.94 (0.92–4.11)
Reconstruction	156
No	128 (82)	0.19	1 (Reference)		0.075	1 (Reference)
Yes	28 (18)		1.72 (0.75–3.96)			2.51 (0.92–7.09)
Chemotherapy	156
No	90 (58)	0.17	1 (Reference)
Yes	66 (42)		1.59 (0.83–3.05)
Radiotherapy	156
Yes	62 (40)	0.8	1 (Reference)
No	94 (60)		1.09 (0.56–2.10)
Presence of psychiatric disorders	156
No	135 (87)	0.026*	1 (Reference)
Yes	21 (13)		2.95 (1.16–7.92)
Presence of family members	156
Yes	135	0.39	1 (Reference)
No	21		1.50 (0.59–3.80)
CARS-J total score	156
< 11	54 (35)	0.079	1 (Reference)		0.028*	1 (Reference)
> 11	102 (65)		1.87 (0.94–3.86)			2.59 (1.14–6.28)
BPI-PI total score	156
<4	144 (92)	0.36	1 (Reference)
>4	12 (8)		1.42 (0.66–3.04)
BMI body mass index, CARS-J Japanese version of the Concerns about Recurrence Scale,
BPI–PI Brief Pain Inventory–Pain Interference, OR odds ratio, CI confidence interval.
*P<0.05 considered statistically significant.
Predictive value: 0.71 (C-statistic, 95% CI: 0.62–0.80).
